# Supplementary material for: Is survival improved by the use of NIV and PEG in amyotrophic lateral sclerosis (ALS)? A post-mortem study of 80 ALS patients
Source: PubMed Central journal article supplement (PMC5441602; doi:10.1371/journal.pone.0177555), 2017-05-23
Supplement: pone.0177555.s001.pdf [file pone.0177555.s001.pdf]

**S1 Table: Concomitant disease found during autopsy**

| <b>Most common concomitant disease</b>                |              |
|-------------------------------------------------------|--------------|
| <b>Vascular diseases</b>                              |              |
| • coronary heart disease, atherosclerosis             | <b>52/80</b> |
| • valvular heart disease                              |              |
| • history of stroke/cardia ischemia                   |              |
| <b>Thrombosis/pulmonary embolisms (prior history)</b> | <b>5/80</b>  |
| <b>Pulmonary diseases</b>                             |              |
| • emphysema                                           | <b>22/80</b> |
| • chronic obstructive pulmonary disease (COPD)        |              |
| • obstructive sleep apnoe syndrome (OSAS)             |              |
| <b>Diverticulosis</b>                                 | <b>12/80</b> |
| <b>Neoplasm</b>                                       | <b>12/80</b> |
| • incidental neoplasm during autopsy                  | 3/80         |
| • history of neoplasm (in remission)                  | 9/80         |

Abbreviations: Absolute number of cases with concomitant diseases not leading to death in the series of 80 autopsies
