# Supplementary material for: Is survival improved by the use of NIV and PEG in amyotrophic lateral sclerosis (ALS)? A post-mortem study of 80 ALS patients
Source: PubMed Central journal article supplement (PMC5441602; doi:10.1371/journal.pone.0177555), 2017-05-23
Supplement: pone.0177555.s002.pdf [file pone.0177555.s002.pdf]

**S2 Table: Causes of death for different ALS phenotypes**

| <b>Causes of death (n=80)</b>       | <b>Clinical phenotypes of ALS (n=80)</b> |             |             |
|-------------------------------------|------------------------------------------|-------------|-------------|
|                                     | spinal (55)                              | bulbar (22) | truncal (3) |
| <b>Bronchopneumonia (23)</b>        | 16                                       | 7           | -           |
| <b>Aspiration pneumonia (15)</b>    | 10                                       | 4           | 1           |
| <b>Hypoxia (20)</b>                 | 16                                       | 2           | 2           |
| <b>Assisted suicide (6)</b>         | 4                                        | 2           | -           |
| <b>Pulmonary embolism (6)</b>       | 3                                        | 3           | -           |
| <b>Combined causes of death (8)</b> | 5                                        | 3           | -           |
| <b>Peritonitis (1)</b>              | -                                        | 1           | -           |
| <b>Cardiac ischemia (1)</b>         | 1                                        | -           | -           |

Abbreviations: between the brackets are the absolute numbers of ALS phenotypes or causes of death displayed.
