# Supplementary material for: Is survival improved by the use of NIV and PEG in amyotrophic lateral sclerosis (ALS)? A post-mortem study of 80 ALS patients
Source: PubMed Central journal article supplement (PMC5441602; doi:10.1371/journal.pone.0177555), 2017-05-23

# S1 Fig: Weight loss during the course of ALS in % of the initial BMI

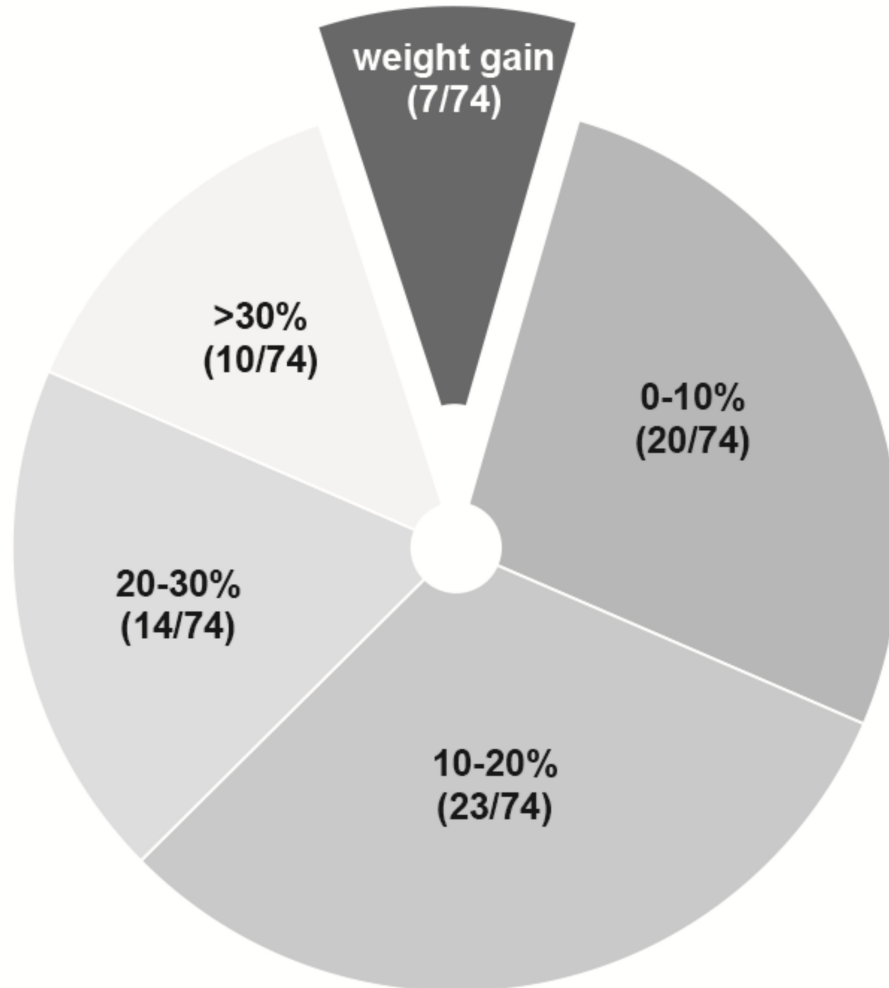

Supplement: pone.0177555.s003.pdf [file pone.0177555.s003.pdf]
